# Supplementary material for: circ-Grm1 promotes pulmonary artery smooth muscle cell proliferation and migration via suppression of GRM1 expression by FUS
Source: PubMed Central journal article supplement — Int J Mol Med. 2021 Sep 16;48(5):202. doi: 10.3892/ijmm.2021.5035 (PMC8480385; doi:10.3892/ijmm.2021.5035), 2021-09-16

Figure S1. Efficiency of transfection. Efficiency of (A) p-FUS, (B) si-FUS, (C) oe-circ-Grm1 and (D) p-Grm1. \*\*P<0.01. NC, negative control; circ, circular RNA; circ-Grm1, circular RNA glutamate metabotropic receptor 1; p-, pcDNA3.1; FUS, FUS RNA binding protein; si, small interfering RNA; oe, overexpression.

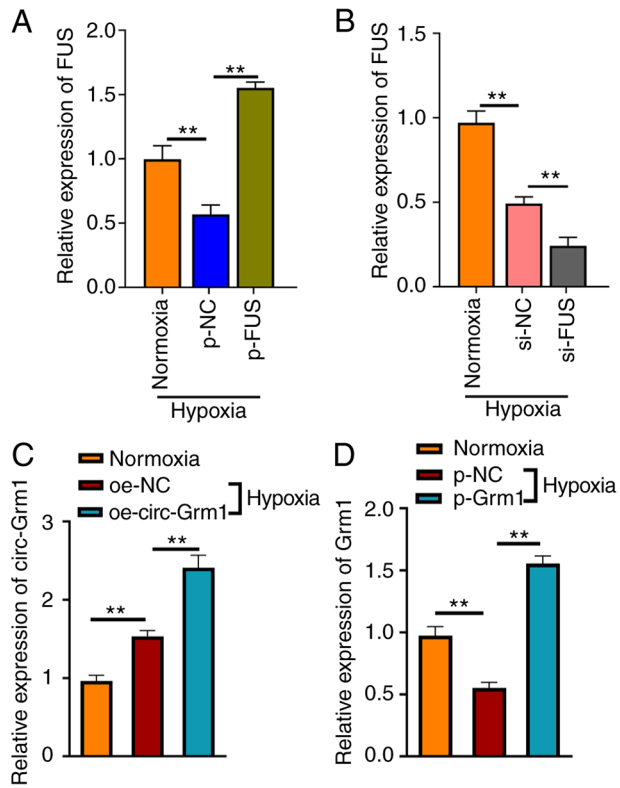

Supplement: Supplementary_Data.pdf [file Supplementary_Data.pdf]
